# Supplementary material for: Mutational pressure drives enhanced release of proteasome-generated public CD8+ T cell epitopes from SARS-CoV-2 RBD of Omicron and its current lineages
Source: medRxiv preprint, doi:10.1101/2024.04.03.24305074, version 1 (2024-04-03)
Supplement: Supplemental Information List [file 305074_file02.docx]

**Supplemental information**

**Mutagenesis drift of SARS-CoV-2 receptor binding domain resulted in enhanced release of proteasome-generated public CD8+ T cell epitopes**

Anna A. Kudriaeva, Ivan O. Butenko, Georgy A. Saratov, Maxim Ri, Yuliana A. Mokrushina, Alexey A. Bondarev, Alena S. Evpak, Ivan V. Smirnov, Darya S. Matushkina, Alexander G. Gabibov, Vadim M. Govorun, Alexey A. Belogurov Jr.

Supplemental Tables 1-9

Supplemental Data 1-2.

**Supplemental tables and data legends**

**Supplemental Table 1** (related to Figures 3, 4, 5). Global data on relative abundance of SARS-CoV-2 S protein RBD peptides in samples, generated by c20S and i20S proteasomes, calculated HLA class I EL ranks, percentage of HLA class I alleles coverage, average HLA class I haplotype protective index and percentage of individuals from 28,104 with at least 1 positive HLA class I allele in haplotype.

**Supplemental Table 2** (related to Figure 5). List of 305 HLA class I alleles, covering 98% haplotypes of 28,104 individuals deposited in Allele Frequency Net Database.

**Supplemental Table 3** (related to Figure 5). SARS-CoV-2 S protein RBD peptides (n=237) positive for HLA class I molecules binding and calculated average HLA class I haplotype protective index and percentage of individuals from 28,104 with at least 1 positive HLA class I allele in haplotype in different countries.

**Supplemental Table 4** (related to Figure 5E). Data on multiple Venn diagrams of S protein RBD peptides of SARS-CoV-2 strains generated by c20S and i20S proteasomes. Protective index (average amount of epitope-positive HLA class I alleles in world population human haplotypes, PI) and percentage of individuals from 28,104 with at least 1 positive HLA class I allele in haplotype for each cluster are listed.

**Supplemental Table 5** (related to Figure 6A). SARS-CoV-2 S protein RBD CD8+ T cell epitopes deposited in Immune Epitope Database (IEDB).

**Supplemental Table 6** (related to Figure 6A). Referencing of proteasome-generated N-terminally extended peptides to core HLA class I CD8+ T cell epitopes listed in the Immune Epitope Database (IEDB). Convoluted relative abundance of SARS-CoV-2 S protein RBD peptides in samples, generated by c20S and i20S proteasomes, Calculated HLA class I EL ranks, percentage of HLA class I alleles coverage, average HLA class I haplotype protective index and percentage of individuals from 28,104 with at least 1 positive HLA class I allele in haplotype.

**Supplemental Table 7** (related to Figure 6 and Figure 7B and 7D). IEDB core HLA class I CD8+ T cell epitopes, calculated HLA class I EL ranks, percentage of HLA class I alleles coverage, average HLA class I haplotype protective index and percentage of individuals from 28,104 with at least 1 positive HLA class I allele in haplotype, data on experimentally observed positive CD8+ T cell assays, convoluted relative abundance of SARS-CoV-2 S protein RBD peptides in samples and average HLA class I haplotype protective index and percentage of individuals from 28,104 with at least 1 positive HLA class I allele in haplotype in different countries. Spearman correlation between 496SFRPTYGVGH505 and 504GHQPYRVVVL513-positive HLA class I haplotypes in different populations and COVID-19-related deaths/cases ratio.

**Supplemental Table 8** (related to Figure 7C). Analysis of population frequency of SARS-CoV-2 S protein RBD 496SFRPTYGVGH505 and 504GHQPYRVVVL513-binding HLA class I molecules in different countries.

**Supplemental Table 9** (related to Figure 7B). Total amount of COVID-19-related deaths/cases in different countries before and after 12/01/2021.

**Supplemental Data 1** (related to Figure 5). Interactive plot representing relative abundance of SARS-CoV-2 S protein RBD peptides in samples, generated by c20S and i20S proteasomes with indication of positive HLA class I alleles and respective EL ranks.

**Supplemental Data 2** (related to Figure 5). Interactive plot with searchable interface representing sequence distribution of SARS-CoV-2 S protein RBD peptides, generated by proteasomes, with indication of positive HLA class I alleles and respective EL ranks.
